# Supplementary material for: Mechanistic studies of Cp*Ir(iii)/Cp*Rh(iii)-catalyzed branch-selective allylic C–H amidation: why is Cp*Ir(iii) superior to Cp*Rh(iii)?
Source: Royal Society of Chemistry journal article supplement (doi:10.1039/d1ob00446h), 2021-01-01
Supplement: d1ob00446h1.pdf [file d1ob00446h1.pdf]

## Supporting Information

### Mechanistic Studies of Cp\*Ir(III)/Cp\*Rh(III)-Catalyzed *Branch-Selective*

### Allylic C–H Amidation: Why is Cp\*Ir(III) Superior to Cp\*Rh(III)?

Nan Ma,<sup>a,b</sup> Zheyuan Liu,<sup>c,\*</sup> Jianhui Huang,<sup>b,\*</sup> and Yanfeng Dang<sup>a,\*</sup>

<sup>a</sup>Department of Chemistry, School of Science, Tianjin University, Tianjin 300072,  
China. yanfeng.dang@tju.edu.cn

<sup>b</sup>School of Pharmaceutical Science and Technology, Tianjin University, Tianjin  
300072, China. jhuang@tju.edu.cn

<sup>c</sup>College of Materials Science and Engineering, Fuzhou University, Fuzhou 350108,  
China. zheyuan.liu@fzu.edu.cn

## Energies and Cartesian Coordinates of All the Structures

All energies are given in Hartree.

### 1cat

SCF energy in gas phase: -722.823697

Free energy in gas phase: -722.596479

Free energy in solution: -722.596479

### IM1

SCF energy in gas phase: -919.40521

Free energy in gas phase: -919.046462

Free energy in solution: -919.25299

|    |           |           |           |    |           |           |           |
|----|-----------|-----------|-----------|----|-----------|-----------|-----------|
| C  | -1.494571 | -0.617055 | -1.054853 | C  | 1.253035  | -1.810017 | -0.472962 |
| C  | -1.502725 | 0.844368  | -0.886316 | C  | 0.793671  | -1.728810 | 0.907670  |
| C  | -1.499998 | 1.128898  | 0.515553  | C  | 1.511327  | -0.647414 | 1.553345  |
| C  | -1.466315 | -0.149798 | 1.221361  | C  | 2.337629  | -0.009879 | 0.574750  |
| C  | -1.499951 | -1.223922 | 0.245771  | C  | 2.179729  | -0.735480 | -0.690856 |
| C  | -1.530721 | -1.331162 | -2.366734 | C  | 0.920246  | -2.895188 | -1.451510 |
| H  | -1.112107 | -2.336237 | -2.292854 | H  | 0.974978  | -2.544398 | -2.483983 |
| H  | -0.984915 | -0.785928 | -3.139709 | H  | -0.073215 | -3.315621 | -1.283495 |
| C  | -1.554259 | 1.840662  | -1.999815 | C  | -0.072227 | -2.728671 | 1.613866  |
| H  | -1.006781 | 1.493985  | -2.878829 | H  | -0.763350 | -3.227724 | 0.932217  |
| H  | -2.598040 | 1.998907  | -2.299130 | H  | 0.555239  | -3.504854 | 2.068680  |
| H  | -1.141784 | 2.804954  | -1.698516 | H  | -0.655905 | -2.265182 | 2.412232  |
| C  | -1.549185 | 2.480931  | 1.156405  | C  | 1.376057  | -0.264075 | 2.992674  |
| H  | -1.133079 | 3.250419  | 0.503824  | H  | 0.350447  | -0.388582 | 3.346710  |
| H  | -2.590566 | 2.748749  | 1.372498  | H  | 2.019742  | -0.908797 | 3.603966  |
| H  | -0.996852 | 2.502469  | 2.098139  | H  | 1.675152  | 0.770200  | 3.168466  |
| C  | -1.466503 | -0.320373 | 2.704177  | C  | 3.288348  | 1.126544  | 0.797573  |
| H  | -0.965162 | 0.507859  | 3.208683  | H  | 3.010149  | 1.725025  | 1.667208  |
| H  | -2.505085 | -0.347868 | 3.059732  | H  | 4.298631  | 0.736903  | 0.971005  |
| H  | -0.987041 | -1.253856 | 3.004515  | H  | 3.330701  | 1.786730  | -0.071320 |
| C  | -1.545682 | -2.689448 | 0.550520  | C  | 2.949641  | -0.453094 | -1.943630 |
| H  | -1.005135 | -2.926679 | 1.469004  | H  | 3.067201  | 0.620347  | -2.107862 |
| H  | -2.586757 | -3.008095 | 0.681291  | H  | 3.951998  | -0.892184 | -1.866636 |
| H  | -1.112444 | -3.282300 | -0.256968 | H  | 2.464523  | -0.880954 | -2.822519 |
| Ir | 0.304109  | 0.002609  | -0.006658 | Ir | 0.232273  | 0.132592  | -0.175506 |
| O  | 2.119630  | 1.089786  | 0.013507  | O  | -0.826960 | 1.777069  | 0.768923  |
| C  | 2.809405  | 0.001436  | 0.006672  | C  | -0.332266 | 2.634294  | -0.042342 |
| O  | 2.121573  | -1.086743 | 0.003298  | O  | 0.437815  | 2.159547  | -0.947028 |
| C  | 4.294964  | 0.004009  | -0.024124 | C  | -0.617958 | 4.096504  | 0.072258  |
| H  | 4.681698  | 0.887654  | 0.486245  | H  | -1.612177 | 4.256784  | 0.492901  |
| H  | 4.685267  | -0.913393 | 0.418676  | H  | 0.114383  | 4.550604  | 0.749153  |
| H  | 4.618832  | 0.046717  | -1.071162 | H  | -0.527895 | 4.578486  | -0.902513 |
| H  | -2.572791 | -1.423886 | -2.698896 | H  | 1.640955  | -3.714437 | -1.342456 |
|    |           |           |           | C  | -1.329758 | -0.002585 | -1.754363 |

|   |           |           |           |    |           |           |           |
|---|-----------|-----------|-----------|----|-----------|-----------|-----------|
| C | -1.847519 | -0.747529 | -0.690283 | Ir | 0.125632  | 0.029549  | -0.359099 |
| H | -0.875991 | -0.494616 | -2.609632 | O  | -2.637129 | 0.687436  | 0.584624  |
| H | -1.701914 | 1.001320  | -1.941234 | C  | -2.259895 | 1.683360  | -0.079630 |
| H | -1.691005 | -1.823924 | -0.716777 | O  | -1.136407 | 1.700785  | -0.727398 |
| C | -2.974833 | -0.302710 | 0.203757  | C  | -3.125233 | 2.913130  | -0.181310 |
| H | -2.818611 | -0.675539 | 1.223358  | H  | -4.038600 | 2.657327  | -0.727290 |
| H | -3.009878 | 0.787799  | 0.263148  | H  | -3.426370 | 3.227935  | 0.821088  |
| C | -4.325462 | -0.844616 | -0.323482 | H  | -2.608235 | 3.722769  | -0.695178 |
| H | -4.486892 | -0.473074 | -1.342752 | H  | 4.339973  | -0.393402 | -0.835369 |
| H | -4.279794 | -1.939013 | -0.395169 | C  | -0.113419 | -0.321522 | -2.531658 |
| C | -5.497449 | -0.433980 | 0.573291  | C  | -0.469822 | -1.467608 | -1.784820 |
| H | -5.586273 | 0.655650  | 0.636804  | H  | 0.790113  | -0.345676 | -3.132811 |
| H | -6.440931 | -0.822824 | 0.179985  | H  | -0.865626 | 0.398823  | -2.838734 |
| H | -5.375392 | -0.820373 | 1.590802  | H  | 0.156411  | -2.356772 | -1.788592 |

### TS1

SCF energy in gas phase: -919.366257

Free energy in gas phase: -919.011927

Free energy in solution: -919.226441

|   |           |           |           |
|---|-----------|-----------|-----------|
| C | 2.343277  | -0.096877 | -0.156531 |
| C | 1.752642  | -1.093257 | 0.716491  |
| C | 0.993944  | -0.400490 | 1.741698  |
| C | 1.041525  | 0.998393  | 1.456854  |
| C | 1.875713  | 1.198160  | 0.266904  |
| C | 3.326766  | -0.365818 | -1.254436 |
| H | 3.305927  | 0.414274  | -2.017483 |
| H | 3.148327  | -1.327911 | -1.739952 |
| C | 2.063153  | -2.560888 | 0.703712  |
| H | 2.301916  | -2.918734 | -0.300262 |
| H | 2.934816  | -2.761443 | 1.338314  |
| H | 1.233572  | -3.156310 | 1.090780  |
| C | 0.304904  | -1.049192 | 2.902144  |
| H | -0.082576 | -2.036740 | 2.642471  |
| H | 1.017080  | -1.180655 | 3.726221  |
| H | -0.523589 | -0.442424 | 3.271293  |
| C | 0.440063  | 2.100043  | 2.274323  |
| H | -0.420980 | 1.755324  | 2.849678  |
| H | 1.184874  | 2.486907  | 2.980104  |
| H | 0.121178  | 2.931957  | 1.643064  |
| C | 2.293186  | 2.528683  | -0.283065 |
| H | 1.474104  | 3.249737  | -0.245624 |
| H | 3.125847  | 2.933041  | 0.305167  |
| H | 2.622832  | 2.450370  | -1.320708 |

|   |           |           |           |
|---|-----------|-----------|-----------|
| O | -2.637129 | 0.687436  | 0.584624  |
| C | -2.259895 | 1.683360  | -0.079630 |
| O | -1.136407 | 1.700785  | -0.727398 |
| C | -3.125233 | 2.913130  | -0.181310 |
| H | -4.038600 | 2.657327  | -0.727290 |
| H | -3.426370 | 3.227935  | 0.821088  |
| H | -2.608235 | 3.722769  | -0.695178 |
| H | 4.339973  | -0.393402 | -0.835369 |
| C | -0.113419 | -0.321522 | -2.531658 |
| C | -0.469822 | -1.467608 | -1.784820 |
| H | 0.790113  | -0.345676 | -3.132811 |
| H | -0.865626 | 0.398823  | -2.838734 |
| H | 0.156411  | -2.356772 | -1.788592 |
| C | -1.639358 | -1.425845 | -0.907526 |
| H | -1.695942 | -0.358594 | 0.076854  |
| H | -2.494517 | -0.924380 | -1.369927 |
| C | -2.006165 | -2.694737 | -0.144362 |
| H | -2.359734 | -3.418879 | -0.891132 |
| H | -1.097703 | -3.127747 | 0.291432  |
| C | -3.080165 | -2.517266 | 0.933414  |
| H | -3.997876 | -2.094041 | 0.514533  |
| H | -3.330380 | -3.484354 | 1.377474  |
| H | -2.746977 | -1.851043 | 1.734173  |

### IM2

SCF energy in gas phase: -919.401329

Free energy in gas phase: -919.041548

Free energy in solution: -919.25064

|   |          |           |           |
|---|----------|-----------|-----------|
| C | 1.870629 | -1.158292 | 0.290622  |
| C | 1.249677 | -0.676362 | 1.518004  |
| C | 1.232356 | 0.750373  | 1.461147  |
| C | 1.913949 | 1.162502  | 0.224773  |
| C | 2.353015 | -0.004031 | -0.459491 |
| C | 2.221148 | -2.587926 | -0.001598 |
| H | 2.294850 | -2.777137 | -1.074919 |
| H | 1.487355 | -3.279780 | 0.417536  |
| C | 0.822299 | -1.529130 | 2.673380  |
| H | 0.470724 | -2.510464 | 2.349694  |
| H | 1.675747 | -1.692300 | 3.343237  |
| H | 0.029026 | -1.060120 | 3.259025  |
| C | 0.828544 | 1.685122  | 2.565653  |
| H | 0.101307 | 1.231632  | 3.242861  |

|    |           |           |           |    |           |           |           |
|----|-----------|-----------|-----------|----|-----------|-----------|-----------|
| H  | 1.707912  | 1.955149  | 3.163245  | C  | -1.987828 | -1.588976 | -0.256021 |
| H  | 0.401744  | 2.614913  | 2.182714  | C  | -3.690364 | 0.401273  | -0.069515 |
| C  | 2.195476  | 2.582650  | -0.165307 | H  | -3.861695 | 0.337475  | -1.146527 |
| H  | 1.387699  | 3.253204  | 0.136698  | H  | -3.631327 | 1.457322  | 0.203920  |
| H  | 3.111663  | 2.931784  | 0.326364  | C  | -2.020449 | 0.911522  | 2.611535  |
| H  | 2.334064  | 2.686703  | -1.243202 | H  | -2.419449 | 1.821697  | 2.160088  |
| C  | 3.187418  | -0.053735 | -1.704161 | H  | -2.772901 | 0.538277  | 3.317276  |
| H  | 3.033313  | 0.827080  | -2.330491 | H  | -1.132345 | 1.180800  | 3.186540  |
| H  | 4.250715  | -0.092128 | -1.437426 | C  | 0.218367  | -1.372148 | 2.814082  |
| H  | 2.970201  | -0.939481 | -2.305125 | H  | 0.425722  | -0.447299 | 3.355364  |
| Ir | 0.076004  | -0.050676 | -0.318396 | H  | -0.216339 | -2.084741 | 3.525674  |
| O  | -2.220433 | 1.695808  | 1.118947  | H  | 1.171368  | -1.790142 | 2.481127  |
| C  | -2.003410 | 2.197964  | -0.080596 | C  | -0.164250 | -3.363344 | 0.354639  |
| O  | -1.178417 | 1.693525  | -0.865461 | H  | 0.865345  | -3.306849 | 0.716990  |
| C  | -2.821524 | 3.397834  | -0.433375 | H  | -0.663116 | -4.151542 | 0.931639  |
| H  | -3.878557 | 3.114113  | -0.466231 | H  | -0.143647 | -3.684648 | -0.689192 |
| H  | -2.715841 | 4.160045  | 0.343692  | C  | -2.596964 | -2.267352 | -1.446337 |
| H  | -2.513351 | 3.791838  | -1.400356 | H  | -1.881116 | -2.915920 | -1.955407 |
| H  | 3.194169  | -2.831595 | 0.441789  | H  | -3.440845 | -2.890949 | -1.126814 |
| C  | -0.490816 | -0.690285 | -2.341787 | H  | -2.981164 | -1.548269 | -2.173564 |
| C  | -0.957209 | -1.642186 | -1.392604 | Ir | -0.355206 | -0.013676 | -0.264208 |
| H  | 0.300504  | -0.982440 | -3.025334 | H  | -4.573488 | -0.017303 | 0.427974  |
| H  | -1.157538 | 0.083068  | -2.713143 | C  | -0.173681 | 0.502462  | -2.385880 |
| H  | -0.471362 | -2.612685 | -1.311777 | C  | -0.734371 | 1.605488  | -1.666747 |
| C  | -1.848630 | -1.220849 | -0.361876 | H  | -0.805546 | -0.028288 | -3.092338 |
| H  | -1.637634 | 0.899089  | 1.199466  | H  | 0.875336  | 0.547610  | -2.667963 |
| H  | -2.594282 | -0.480845 | -0.655745 | H  | -1.791632 | 1.843103  | -1.764541 |
| C  | -2.309066 | -2.177146 | 0.717572  | C  | 0.021071  | 2.201814  | -0.623408 |
| H  | -1.503295 | -2.881545 | 0.956615  | H  | 1.100825  | 2.238984  | -0.755952 |
| H  | -2.522702 | -1.624082 | 1.640334  | C  | -0.533736 | 3.306115  | 0.243601  |
| C  | -3.568465 | -2.957477 | 0.299796  | H  | -1.617383 | 3.183528  | 0.357700  |
| H  | -3.382939 | -3.560028 | -0.594921 | H  | -0.097057 | 3.237222  | 1.246382  |
| H  | -3.886776 | -3.630650 | 1.100941  | C  | -0.231410 | 4.698855  | -0.340467 |
| H  | -4.400586 | -2.280081 | 0.082131  | H  | -0.683984 | 4.822903  | -1.329387 |
|    |           |           |           | H  | -0.626127 | 5.481880  | 0.313250  |
|    |           |           |           | H  | 0.846744  | 4.860160  | -0.440648 |
|    |           |           |           | N  | 1.757159  | -0.168156 | -0.205615 |
|    |           |           |           | C  | 2.679324  | -0.866283 | -0.792509 |
|    |           |           |           | C  | 3.774126  | 0.327191  | 0.711650  |
|    |           |           |           | O  | 2.437037  | 0.619478  | 0.775735  |
|    |           |           |           | O  | 4.642608  | 0.779780  | 1.374167  |
|    |           |           |           | O  | 3.908570  | -0.624801 | -0.300198 |
|    |           |           |           | C  | 2.526783  | -1.850102 | -1.888040 |
|    |           |           |           | H  | 1.477965  | -1.941213 | -2.165761 |
| C  | -2.461543 | -0.354033 | 0.347712  |    |           |           |           |
| C  | -1.724273 | -0.139558 | 1.585637  |    |           |           |           |
| C  | -0.729424 | -1.152546 | 1.671602  |    |           |           |           |
| C  | -0.889930 | -2.060399 | 0.526267  |    |           |           |           |

**IM3**

SCF energy in gas phase:-1086.81984

Free energy in gas phase: -1086.456322

Free energy in solution: -1086.708308

H 3.116413 -1.528758 -2.752585  
H 2.915812 -2.820463 -1.564350

## TS2

SCF energy in gas phase:-1086.791679

Free energy in gas phase: -1086.433823

Free energy in solution: -1086.708878

C -2.415928 0.205647 0.730074  
C -1.392096 0.087092 1.744613  
C -0.766587 -1.205111 1.587388  
C -1.420057 -1.895083 0.489274  
C -2.436625 -1.018211 -0.037712  
C -3.411180 1.324087 0.623329  
H -3.815020 1.421668 -0.386643  
H -2.981321 2.284248 0.916750  
C -1.110759 1.062563 2.846069  
H -1.359447 2.084827 2.556540  
H -1.716812 0.811446 3.725461  
H -0.061460 1.037861 3.146419  
C 0.292472 -1.769005 2.484696  
H 1.023439 -1.008486 2.765467  
H -0.170430 -2.153621 3.401423  
H 0.826729 -2.595417 2.013082  
C -1.177419 -3.312764 0.067686  
H -0.140463 -3.613323 0.228460  
H -1.810522 -3.986853 0.657663  
H -1.420351 -3.468547 -0.985454  
C -3.426106 -1.370363 -1.107595  
H -3.001511 -2.054186 -1.845387  
H -4.293734 -1.867312 -0.656876  
H -3.794837 -0.486459 -1.632113  
Ir -0.390021 -0.028457 -0.307180  
H -4.256729 1.126735 1.293107  
C -0.493962 0.519730 -2.448634  
C -0.664038 1.697822 -1.662086  
H -1.343777 0.137329 -3.005297  
H 0.478278 0.300899 -2.878024  
H -1.648185 2.153223 -1.570780  
C 0.374952 2.129910 -0.807407  
H 1.394813 1.860324 -1.068003  
C 0.244961 3.285999 0.141968  
H -0.807338 3.465361 0.391358  
H 0.773316 3.044911 1.070069

C 0.862400 4.563029 -0.468084  
H 0.350814 4.853515 -1.390586  
H 0.780205 5.390586 0.241530  
H 1.922921 4.419098 -0.694492  
N 1.421881 -0.542808 -0.542259  
C 2.458750 -1.260995 -0.859196  
C 3.767650 0.054677 0.838203  
O 2.643558 0.566487 0.896326  
O 4.866233 0.074622 1.277352  
O 3.633020 -1.164796 -0.367549  
C 2.260472 -2.310982 -1.944363  
H 1.234530 -2.346266 -2.309235  
H 2.944413 -2.078605 -2.764968  
H 2.547023 -3.280855 -1.529163

## IM4

SCF energy in gas phase: -898.242264

Free energy in gas phase: -897.894549

Free energy in solution: -898.109719

C 1.747874 -1.408991 -0.142652  
C 1.418161 -1.047511 1.222524  
C 1.684742 0.362373 1.385972  
C 2.165527 0.870568 0.120518  
C 2.198979 -0.228623 -0.823120  
C 1.775877 -2.804722 -0.693156  
H 1.634720 -2.823060 -1.776287  
H 1.015756 -3.441249 -0.235800  
C 1.037996 -1.999722 2.315476  
H 0.471833 -2.851682 1.935487  
H 1.944782 -2.392119 2.792235  
H 0.441867 -1.512224 3.089257  
C 1.569678 1.163379 2.645527  
H 1.010882 0.627503 3.414068  
H 2.566479 1.384852 3.043433  
H 1.058974 2.111946 2.459659  
C 2.661145 2.261981 -0.125637  
H 2.151547 2.986546 0.511594  
H 3.733517 2.312515 0.101868  
H 2.529734 2.564325 -1.166497  
C 2.743624 -0.161208 -2.218634  
H 2.578705 0.818985 -2.670784  
H 3.825683 -0.339659 -2.204125  
H 2.297686 -0.917360 -2.868644

|    |           |           |           |    |           |           |           |
|----|-----------|-----------|-----------|----|-----------|-----------|-----------|
| Ir | 0.011317  | 0.152657  | -0.157361 | H  | 1.487372  | 3.193309  | 0.302942  |
| H  | 2.750515  | -3.262805 | -0.485746 | C  | 3.070043  | 1.247450  | -1.220719 |
| C  | -1.026885 | 0.230389  | -2.093744 | H  | 2.619375  | 2.211774  | -1.463242 |
| C  | -1.270552 | -1.039435 | -1.490479 | H  | 4.078974  | 1.439356  | -0.834156 |
| H  | -0.402111 | 0.273440  | -2.980539 | H  | 3.171707  | 0.676656  | -2.145907 |
| H  | -1.780337 | 1.009152  | -2.029601 | C  | 2.999784  | -1.932231 | -0.832625 |
| H  | -0.779824 | -1.929483 | -1.878721 | H  | 3.135254  | -1.583845 | -1.858626 |
| C  | -1.954392 | -1.109808 | -0.253258 | H  | 3.996294  | -2.107474 | -0.410058 |
| H  | -2.656181 | -0.317509 | 0.000420  | H  | 2.485520  | -2.895641 | -0.865820 |
| C  | -2.146933 | -2.394685 | 0.500678  | Ir | 0.159900  | -0.075689 | -0.372271 |
| H  | -1.365613 | -3.119229 | 0.244315  | H  | 1.940591  | -2.754956 | 2.536343  |
| H  | -2.077897 | -2.196679 | 1.575688  | C  | -0.414674 | -1.218179 | -2.220361 |
| C  | -3.536362 | -2.994410 | 0.192727  | C  | -1.185953 | -1.673033 | -1.126448 |
| H  | -3.640027 | -3.235689 | -0.869440 | H  | 0.383322  | -1.846467 | -2.601212 |
| H  | -3.678639 | -3.914654 | 0.765635  | H  | -0.829705 | -0.499166 | -2.917576 |
| H  | -4.335457 | -2.299245 | 0.465517  | H  | -0.922291 | -2.588579 | -0.600068 |
| N  | -0.924090 | 1.637937  | 0.501792  | C  | -2.328880 | -0.945746 | -0.640437 |
| C  | -2.166907 | 2.185943  | 0.303187  | H  | -2.910737 | -0.387838 | -1.363516 |
| O  | -3.159862 | 1.643108  | 0.788186  | C  | -3.011797 | -1.257926 | 0.648476  |
| C  | -2.195821 | 3.529631  | -0.393567 | H  | -2.364028 | -1.864889 | 1.290703  |
| H  | -3.112401 | 3.597067  | -0.985117 | H  | -3.201315 | -0.311180 | 1.166678  |
| H  | -2.222451 | 4.319100  | 0.364695  | C  | -4.354388 | -1.980313 | 0.388975  |
| H  | -1.320127 | 3.691303  | -1.027974 | H  | -4.208730 | -2.937120 | -0.120704 |

### TS3A

SCF energy in gas phase: -898.231532

Free energy in gas phase: -897.881945

Free energy in solution: -898.095738

|   |           |           |           |
|---|-----------|-----------|-----------|
| C | 1.458577  | -1.203803 | 1.152209  |
| C | 1.016199  | 0.059320  | 1.728050  |
| C | 1.518749  | 1.120740  | 0.904554  |
| C | 2.271742  | 0.505907  | -0.192624 |
| C | 2.259395  | -0.928578 | 0.000500  |
| C | 1.204079  | -2.555766 | 1.748596  |
| H | 1.295799  | -3.353278 | 1.008406  |
| H | 0.214192  | -2.621144 | 2.206418  |
| C | 0.225507  | 0.236232  | 2.987446  |
| H | -0.250941 | -0.694315 | 3.300688  |
| H | 0.890438  | 0.556664  | 3.799067  |
| H | -0.551806 | 0.994137  | 2.862364  |
| C | 1.425382  | 2.586009  | 1.208416  |
| H | 0.491369  | 2.826151  | 1.720886  |
| H | 2.253817  | 2.883379  | 1.862481  |

|    |           |           |           |
|----|-----------|-----------|-----------|
| H  | 1.487372  | 3.193309  | 0.302942  |
| C  | 3.070043  | 1.247450  | -1.220719 |
| H  | 2.619375  | 2.211774  | -1.463242 |
| H  | 4.078974  | 1.439356  | -0.834156 |
| H  | 3.171707  | 0.676656  | -2.145907 |
| C  | 2.999784  | -1.932231 | -0.832625 |
| H  | 3.135254  | -1.583845 | -1.858626 |
| H  | 3.996294  | -2.107474 | -0.410058 |
| H  | 2.485520  | -2.895641 | -0.865820 |
| Ir | 0.159900  | -0.075689 | -0.372271 |
| H  | 1.940591  | -2.754956 | 2.536343  |
| C  | -0.414674 | -1.218179 | -2.220361 |
| C  | -1.185953 | -1.673033 | -1.126448 |
| H  | 0.383322  | -1.846467 | -2.601212 |
| H  | -0.829705 | -0.499166 | -2.917576 |
| H  | -0.922291 | -2.588579 | -0.600068 |
| C  | -2.328880 | -0.945746 | -0.640437 |
| H  | -2.910737 | -0.387838 | -1.363516 |
| C  | -3.011797 | -1.257926 | 0.648476  |
| H  | -2.364028 | -1.864889 | 1.290703  |
| H  | -3.201315 | -0.311180 | 1.166678  |
| C  | -4.354388 | -1.980313 | 0.388975  |
| H  | -4.208730 | -2.937120 | -0.120704 |
| H  | -4.849360 | -2.176131 | 1.343508  |
| H  | -5.025435 | -1.365075 | -0.217461 |
| N  | -1.311781 | 1.060091  | -0.846179 |
| C  | -1.740285 | 2.145152  | -0.105664 |
| O  | -2.223403 | 2.021218  | 1.019202  |
| C  | -1.680529 | 3.468928  | -0.845210 |
| H  | -2.665079 | 3.670105  | -1.280981 |
| H  | -1.458035 | 4.264614  | -0.130616 |
| H  | -0.946864 | 3.463643  | -1.654865 |

### TS3B

SCF energy in gas phase: -898.221545

Free energy in gas phase: -897.872714

Free energy in solution: -898.089256

|   |           |           |           |
|---|-----------|-----------|-----------|
| C | -0.647289 | -2.045912 | -0.546495 |
| C | -0.603868 | -1.833111 | 0.874632  |
| C | 0.758304  | -1.480143 | 1.242647  |
| C | 1.555269  | -1.461664 | 0.040259  |
| C | 0.672533  | -1.799032 | -1.068373 |
| C | -1.829088 | -2.533985 | -1.332467 |

|   |           |           |           |   |                                       |           |           |
|---|-----------|-----------|-----------|---|---------------------------------------|-----------|-----------|
| H | -1.814555 | -2.169297 | -2.362356 |   | Free energy in gas phase: -897.945557 |           |           |
| H | -2.774110 | -2.229673 | -0.877392 |   | Free energy in solution: -898.153611  |           |           |
| C | -1.722252 | -2.078372 | 1.839873  |   |                                       |           |           |
| H | -2.700235 | -1.933432 | 1.378502  | C | 1.856332                              | -0.427148 | 1.331129  |
| H | -1.673514 | -3.115501 | 2.194123  | C | 1.634904                              | 1.006731  | 1.105014  |
| H | -1.655158 | -1.429478 | 2.715288  | C | 1.890687                              | 1.277941  | -0.271097 |
| C | 1.272173  | -1.251827 | 2.630274  | C | 2.255268                              | 0.009964  | -0.911388 |
| H | 0.465089  | -1.008261 | 3.323367  | C | 2.290989                              | -1.015883 | 0.096284  |
| H | 1.760596  | -2.165428 | 2.992052  | C | 1.786182                              | -1.109890 | 2.660796  |
| H | 1.997040  | -0.435573 | 2.652389  | H | 1.604967                              | -2.181400 | 2.557195  |
| C | 3.042176  | -1.288474 | -0.021129 | H | 1.001625                              | -0.686928 | 3.291613  |
| H | 3.390318  | -0.566179 | 0.720593  | C | 1.290430                              | 2.012627  | 2.157601  |
| H | 3.535562  | -2.245940 | 0.185278  | H | 0.749682                              | 1.554896  | 2.988531  |
| H | 3.369948  | -0.955577 | -1.008446 | H | 2.213153                              | 2.448598  | 2.561161  |
| C | 1.100208  | -1.981315 | -2.492499 | H | 0.673184                              | 2.811789  | 1.747384  |
| H | 1.940213  | -1.333080 | -2.750541 | C | 1.849505                              | 2.619076  | -0.928162 |
| H | 1.424956  | -3.017561 | -2.648692 | H | 0.990465                              | 3.194453  | -0.576614 |
| H | 0.284294  | -1.786214 | -3.191872 | H | 2.762862                              | 3.176600  | -0.685509 |
|   | -0.009184 | 0.113018  | -0.100739 | H | 1.791266                              | 2.534212  | -2.014867 |
| H | -1.824830 | -3.629637 | -1.375048 | C | 2.669151                              | -0.141189 | -2.341989 |
| C | -0.318420 | 1.975927  | -1.700452 | H | 2.108667                              | 0.528888  | -2.997572 |
| C | -1.510945 | 1.328440  | -1.217455 | H | 3.732921                              | 0.105618  | -2.447642 |
| H | -2.038095 | 0.656002  | -1.892685 | H | 2.531567                              | -1.164294 | -2.697077 |
| C | -1.962736 | 1.498385  | 0.099407  | C | 2.745023                              | -2.433571 | -0.091885 |
| H | -1.532379 | 2.308499  | 0.680256  | H | 2.603261                              | -2.775734 | -1.119216 |
| C | -3.268644 | 0.941860  | 0.594364  | H | 3.815122                              | -2.513009 | 0.132895  |
| H | -3.552011 | 0.058735  | 0.010005  | H | 2.220002                              | -3.122590 | 0.574042  |
| H | -3.158872 | 0.622680  | 1.636251  | H | 2.739643                              | -0.983234 | 3.189525  |
| C | -4.386398 | 2.002510  | 0.511170  | C | -0.595361                             | -1.907870 | -1.399232 |
| H | -4.556895 | 2.319779  | -0.521991 | C | -1.471056                             | -1.706798 | -0.343166 |
| H | -5.322505 | 1.592373  | 0.899861  | H | 0.084501                              | -2.753358 | -1.393450 |
| H | -4.136969 | 2.888624  | 1.102564  | H | -0.764224                             | -1.437913 | -2.365855 |
| N | 0.800734  | 1.827756  | 0.212342  | H | -1.477207                             | -2.392072 | 0.500684  |
| C | 2.144871  | 2.041223  | 0.479235  | C | -2.536448                             | -0.600609 | -0.381568 |
| O | 2.570232  | 1.720863  | 1.585631  | H | -3.033557                             | -0.561367 | -1.362528 |
| C | 2.967083  | 2.768618  | -0.560965 | C | -3.592789                             | -0.788036 | 0.719519  |
| H | 3.993740  | 2.851263  | -0.201200 | H | -3.077302                             | -0.888480 | 1.683263  |
| H | 2.953704  | 2.240809  | -1.520113 | H | -4.207974                             | 0.113002  | 0.787533  |
| H | 2.563435  | 3.772642  | -0.726901 | C | -4.497958                             | -1.999009 | 0.461819  |
| H | 0.128020  | 1.626734  | -2.626869 | H | -3.930999                             | -2.934978 | 0.412693  |
| H | -0.104489 | 3.000319  | -1.433120 | H | -5.232712                             | -2.103800 | 1.264166  |
|   |           |           |           | H | -5.047520                             | -1.891923 | -0.479198 |
|   |           |           |           | N | -1.627966                             | 0.548557  | -0.193762 |
|   |           |           |           | C | -2.002723                             | 1.904777  | -0.163764 |

**IM5A**

SCF energy in gas phase:-898.299266

O -1.186689 2.752586 0.165259  
C -3.409121 2.284964 -0.581198  
H -4.043906 2.370105 0.307266  
H -3.364935 3.270832 -1.046589  
H -3.872088 1.573664 -1.268043  
Ir 0.186243 -0.195696 -0.106777

### IM5B

SCF energy in gas phase:-898.300823

Free energy in gas phase: -897.948405

Free energy in solution: -898.156914

C -1.339921 -1.784395 -0.229138  
C -0.778061 -1.684675 1.087820  
C 0.679695 -1.800191 0.981607  
C 1.005648 -1.909047 -0.405150  
C -0.249146 -1.856892 -1.162255  
C -2.792682 -1.900088 -0.582130  
H -3.029389 -1.395346 -1.521627  
H -3.440620 -1.495186 0.195844  
C -1.532796 -1.637289 2.379895  
H -2.548423 -1.260908 2.246558  
H -1.607913 -2.647759 2.800575  
H -1.027668 -1.011339 3.119223  
C 1.642147 -1.867778 2.123312  
H 1.219581 -1.433864 3.031719  
H 1.884830 -2.916626 2.336683  
H 2.565866 -1.338544 1.882314  
C 2.366668 -2.140290 -0.981105  
H 3.125413 -1.590963 -0.423004  
H 2.601966 -3.211205 -0.937590  
H 2.417814 -1.833053 -2.027717  
C -0.366396 -2.015876 -2.645414  
H 0.465183 -1.539002 -3.168689  
H -0.351820 -3.082452 -2.904103  
H -1.299208 -1.595304 -3.025913  
Ir 0.016977 0.050957 -0.080427  
H -3.051831 -2.958548 -0.705068  
C 0.569067 2.711021 -0.538941  
C -0.802559 2.082932 -0.774027  
H -1.179503 2.011385 -1.792105  
C -1.629982 1.778026 0.290682  
H -1.304171 2.076761 1.289029  
C -3.095332 1.465065 0.155840

H -3.301615 1.045682 -0.834046  
H -3.389633 0.719079 0.900478  
C -3.937618 2.740430 0.368223  
H -3.703128 3.498934 -0.384273  
H -5.001761 2.502018 0.290434  
H -3.763131 3.175701 1.357078  
N 1.306964 1.531969 -0.083328  
C 2.682252 1.533932 0.195493  
O 3.241254 0.507412 0.551463  
C 3.414818 2.850977 0.047704  
H 4.451817 2.706620 0.348352  
H 3.388037 3.201262 -0.989991  
H 2.962862 3.630754 0.669887  
H 0.971291 3.123187 -1.471115  
H 0.544319 3.516795 0.207014

### IM6

SCF energy in gas phase: -1127.404197

Free energy in gas phase: -1126.992722

Free energy in solution: -1127.238315

C 0.855624 -2.142046 0.428888  
C 0.832002 -1.319554 1.619417  
C 1.797351 -0.275682 1.449363  
C 2.515446 -0.523824 0.188902  
C 1.940767 -1.665751 -0.432572  
C 0.128371 -3.440566 0.246883  
H -0.029883 -3.678598 -0.807373  
H -0.839799 -3.443939 0.750214  
C -0.017224 -1.539422 2.830079  
H -0.905166 -2.132075 2.601046  
H 0.565060 -2.090558 3.579400  
H -0.335448 -0.591183 3.263960  
C 2.137795 0.781569 2.454214  
H 1.242490 1.120295 2.977614  
H 2.849346 0.386453 3.189678  
H 2.600609 1.646319 1.974893  
C 3.677663 0.282446 -0.298643  
H 3.482009 1.352651 -0.202595  
H 4.565822 0.047369 0.299826  
H 3.909573 0.069294 -1.343488  
C 2.404652 -2.340149 -1.688919  
H 2.941944 -1.652538 -2.344537  
H 3.085550 -3.162614 -1.439214



|    |           |           |           |   |           |           |           |
|----|-----------|-----------|-----------|---|-----------|-----------|-----------|
| H  | 1.573052  | -2.768934 | -2.254118 | H | 0.266949  | -3.633729 | -0.937280 |
| H  | 0.726089  | -4.254187 | 0.676203  | H | -0.538542 | -3.542168 | 0.637159  |
| C  | -0.399092 | 0.000013  | -2.370068 | C | 0.141064  | -1.689791 | 2.791107  |
| C  | -1.280771 | -0.789803 | -1.631137 | H | -0.711156 | -2.323336 | 2.536674  |
| H  | 0.304074  | -0.465243 | -3.053678 | H | 0.778976  | -2.258268 | 3.480166  |
| H  | -0.630568 | 1.040106  | -2.578453 | H | -0.226949 | -0.805964 | 3.310732  |
| H  | -1.252866 | -1.869602 | -1.741463 | C | 2.066031  | 0.853080  | 2.510770  |
| C  | -2.428160 | -0.192882 | -0.804518 | H | 1.168494  | 1.041054  | 3.101664  |
| H  | -3.079133 | 0.437902  | -1.429847 | H | 2.865068  | 0.520201  | 3.184621  |
| C  | -3.280059 | -1.303552 | -0.169084 | H | 2.380725  | 1.796986  | 2.061194  |
| H  | -2.616577 | -1.972445 | 0.393766  | C | 3.624820  | 0.613405  | -0.258281 |
| H  | -3.968307 | -0.866645 | 0.556955  | H | 3.312137  | 1.655393  | -0.158955 |
| C  | -4.091557 | -2.093175 | -1.204201 | H | 4.517533  | 0.465561  | 0.360636  |
| H  | -3.457345 | -2.581176 | -1.952051 | H | 3.902492  | 0.437088  | -1.298675 |
| H  | -4.678661 | -2.874850 | -0.714895 | C | 2.583356  | -2.051653 | -1.762140 |
| H  | -4.789792 | -1.440675 | -1.738527 | H | 3.042727  | -1.288927 | -2.393424 |
| N  | -1.616001 | 0.622160  | 0.138867  | H | 3.345759  | -2.809483 | -1.545820 |
| C  | -2.036285 | 1.098416  | 1.377123  | H | 1.794346  | -2.541238 | -2.338636 |
| O  | -1.220196 | 1.363654  | 2.254203  | H | 1.087389  | -4.215377 | 0.508900  |
| C  | -3.508136 | 1.434832  | 1.568069  | C | -0.360208 | 0.055899  | -2.369744 |
| H  | -3.957996 | 0.728464  | 2.272774  | C | -1.189617 | -0.813028 | -1.658279 |
| H  | -3.560719 | 2.424134  | 2.028436  | H | 0.387060  | -0.343605 | -3.047815 |
| H  | -4.090518 | 1.434824  | 0.644798  | H | -0.661365 | 1.081410  | -2.556408 |
| Ir | 0.346646  | -0.086906 | -0.247481 | H | -1.089784 | -1.885793 | -1.792896 |
| C  | 0.296834  | 3.030858  | -0.766897 | C | -2.392201 | -0.318015 | -0.846207 |
| O  | 0.982128  | 2.000265  | -0.576597 | H | -3.084772 | 0.265418  | -1.469545 |
| O  | -1.005119 | 3.022644  | -0.802927 | C | -3.149871 | -1.493676 | -0.213323 |
| C  | 0.949097  | 4.364717  | -0.965533 | H | -2.437338 | -2.102152 | 0.358429  |
| H  | 0.473146  | 4.889130  | -1.797690 | H | -3.885074 | -1.119277 | 0.502203  |
| H  | 0.791266  | 4.968483  | -0.065329 | C | -3.879366 | -2.353532 | -1.253834 |
| H  | 2.017229  | 4.249388  | -1.143583 | H | -3.197947 | -2.795566 | -1.988245 |
| H  | -1.334628 | 2.095922  | -0.504407 | H | -4.408417 | -3.175394 | -0.764322 |

#### TS4

SCF energy in gas phase: -1127.40174

Free energy in gas phase: -1126.993651

Free energy in solution: -1127.23753

|   |          |           |           |    |           |           |           |
|---|----------|-----------|-----------|----|-----------|-----------|-----------|
| C | 1.037383 | -2.088412 | 0.365134  | H  | -3.735098 | 2.187007  | 2.006663  |
| C | 0.944893 | -1.323203 | 1.585060  | H  | -4.196764 | 1.183837  | 0.611786  |
| C | 1.809791 | -0.184230 | 1.460781  | Ir | 0.362988  | -0.034773 | -0.239222 |
| C | 2.542203 | -0.314144 | 0.194552  | C  | 0.006603  | 3.010081  | -0.721560 |
| C | 2.063783 | -1.476146 | -0.478599 | O  | 0.829706  | 2.058468  | -0.517726 |
| C | 0.419652 | -3.433814 | 0.125819  | O  | -1.255448 | 2.849185  | -0.777524 |

|   |           |          |           |   |           |           |           |
|---|-----------|----------|-----------|---|-----------|-----------|-----------|
| C | 0.558629  | 4.399206 | -0.894900 | H | -3.478216 | -1.459508 | 0.062920  |
| H | 0.032421  | 4.902666 | -1.709012 | H | -4.340573 | 0.046026  | 0.307033  |
| H | 0.367166  | 4.968620 | 0.020864  | C | -4.554466 | -0.750188 | -1.691046 |
| H | 1.630973  | 4.376930 | -1.086452 | H | -3.994028 | -1.318227 | -2.441841 |
| H | -1.531995 | 1.723013 | -0.373013 | H | -5.456108 | -1.321953 | -1.457602 |

**IM7**

SCF energy in gas phase: -1127.41142

Free energy in gas phase: -1127.000321

Free energy in solution: -1127.249596

|   |           |           |           |
|---|-----------|-----------|-----------|
| C | 0.602266  | -2.124780 | 0.537470  |
| C | 1.187793  | -1.262294 | 1.552551  |
| C | 2.220764  | -0.492810 | 0.943497  |
| C | 2.332175  | -0.895671 | -0.459207 |
| C | 1.365919  | -1.945833 | -0.682366 |
| C | -0.432229 | -3.177612 | 0.802994  |
| H | -0.875012 | -3.551465 | -0.122695 |
| H | -1.233669 | -2.788989 | 1.434921  |
| C | 0.798421  | -1.261366 | 2.995833  |
| H | -0.278902 | -1.384038 | 3.123935  |
| H | 1.287441  | -2.108184 | 3.493940  |
| H | 1.116786  | -0.351223 | 3.507066  |
| C | 3.100086  | 0.527907  | 1.592322  |
| H | 2.751539  | 0.792697  | 2.591721  |
| H | 4.119832  | 0.135900  | 1.682854  |
| H | 3.140807  | 1.437490  | 0.987122  |
| C | 3.395277  | -0.419874 | -1.401936 |
| H | 3.540741  | 0.658843  | -1.311902 |
| H | 4.348750  | -0.911983 | -1.175262 |
| H | 3.144655  | -0.641758 | -2.440897 |
| C | 1.245602  | -2.778813 | -1.921188 |
| H | 1.597506  | -2.249580 | -2.808574 |
| H | 1.866630  | -3.675477 | -1.806763 |
| H | 0.221952  | -3.115574 | -2.098342 |
| H | 0.026071  | -4.031971 | 1.315741  |
| C | -0.488398 | 0.271781  | -2.305630 |
| C | -1.429061 | -0.448604 | -1.560027 |
| H | 0.137446  | -0.230093 | -3.036250 |
| H | -0.603038 | 1.342217  | -2.443669 |
| H | -1.557720 | -1.517629 | -1.705959 |
| C | -2.470114 | 0.290589  | -0.723419 |
| H | -2.768273 | 1.203102  | -1.252635 |
| C | -3.734739 | -0.511197 | -0.415300 |

|    |           |           |           |
|----|-----------|-----------|-----------|
| H  | -4.867546 | 0.192857  | -2.151137 |
| N  | -1.648077 | 0.781375  | 0.453551  |
| C  | -1.947948 | 0.419598  | 1.809549  |
| O  | -2.311791 | -0.697963 | 2.111241  |
| C  | -1.763014 | 1.545970  | 2.798641  |
| H  | -1.674517 | 1.138214  | 3.805660  |
| H  | -0.902747 | 2.174602  | 2.554529  |
| H  | -2.649168 | 2.191405  | 2.761469  |
| Ir | 0.324716  | -0.042232 | -0.255779 |
| C  | 0.430424  | 3.073050  | -0.396407 |
| O  | 1.071776  | 1.938453  | -0.457034 |
| O  | -0.783042 | 3.197372  | -0.157682 |
| C  | 1.302538  | 4.286663  | -0.648067 |
| H  | 0.697728  | 5.192225  | -0.609380 |
| H  | 2.093918  | 4.340422  | 0.105541  |
| H  | 1.787502  | 4.202964  | -1.624710 |
| H  | -1.449714 | 1.808951  | 0.331463  |

**2cat**

SCF energy in gas phase: -729.023436

Free energy in gas phase: -728.79914

Free energy in solution: -728.999417

|   |          |           |           |
|---|----------|-----------|-----------|
| C | 1.563275 | 0.733534  | -0.847489 |
| C | 1.562844 | -0.735879 | -0.846078 |
| C | 1.372011 | -1.182748 | 0.494021  |
| C | 1.211807 | 0.001101  | 1.328256  |
| C | 1.372740 | 1.183138  | 0.491757  |
| C | 1.762401 | 1.586842  | -2.057874 |
| H | 1.366701 | 2.593634  | -1.915538 |
| H | 1.290239 | 1.152326  | -2.942217 |
| C | 1.761215 | -1.591619 | -2.054891 |
| H | 1.286402 | -1.160051 | -2.939286 |
| H | 2.834546 | -1.677630 | -2.268443 |
| H | 1.367603 | -2.598766 | -1.909419 |
| C | 1.336107 | -2.598610 | 0.976931  |
| H | 1.072611 | -3.291861 | 0.176642  |
| H | 2.324571 | -2.883637 | 1.357643  |
| H | 0.616538 | -2.730144 | 1.787962  |

|    |           |           |           |   |           |           |           |
|----|-----------|-----------|-----------|---|-----------|-----------|-----------|
| C  | 1.011120  | 0.002534  | 2.806137  | H | 3.036170  | 0.850629  | -2.077423 |
| H  | 0.471912  | -0.884340 | 3.144476  | H | 4.104196  | -0.531022 | -1.800111 |
| H  | 1.993097  | 0.001820  | 3.299090  | H | 2.661129  | -0.718928 | -2.804071 |
| H  | 0.473864  | 0.891121  | 3.143051  | O | -0.771702 | 1.748470  | 0.767365  |
| C  | 1.337689  | 2.599996  | 0.971830  | C | -0.371892 | 2.586390  | -0.112435 |
| H  | 0.617584  | 2.733795  | 1.782021  | O | 0.360224  | 2.122394  | -1.051911 |
| H  | 2.326099  | 2.884923  | 1.352744  | C | -0.726858 | 4.038631  | -0.034345 |
| H  | 1.075436  | 3.291846  | 0.169927  | H | -1.679353 | 4.170617  | 0.481641  |
| O  | -2.157409 | -1.092614 | -0.088421 | H | 0.046501  | 4.563605  | 0.537416  |
| C  | -2.834929 | 0.000808  | -0.119777 | H | -0.764379 | 4.474423  | -1.034250 |
| O  | -2.157225 | 1.093835  | -0.088599 | H | 1.855359  | -3.642811 | -1.348365 |
| C  | -4.321187 | 0.000235  | -0.216396 | C | -1.296803 | -0.177193 | -1.809333 |
| H  | -4.730644 | -0.885667 | 0.272206  | C | -1.860046 | -0.804115 | -0.718631 |
| H  | -4.729513 | 0.914416  | 0.217246  | H | -0.752948 | -0.737692 | -2.563280 |
| H  | -4.602662 | -0.034374 | -1.275566 | H | -1.611230 | 0.821453  | -2.097010 |
| H  | 2.836022  | 1.674353  | -2.269407 | H | -1.669603 | -1.868826 | -0.594152 |
| Rh | -0.359642 | 0.000055  | -0.118346 | C | -2.985013 | -0.259087 | 0.115350  |

### IMI'

SCF energy in gas phase: -925.601381

Free energy in gas phase: -925.245353

Free energy in solution: -925.454294

|   |           |           |           |
|---|-----------|-----------|-----------|
| C | 1.424077  | -1.731668 | -0.511705 |
| C | 0.922884  | -1.709127 | 0.853276  |
| C | 1.529708  | -0.588199 | 1.528554  |
| C | 2.346676  | 0.118787  | 0.583700  |
| C | 2.290428  | -0.604707 | -0.682638 |
| C | 1.162337  | -2.809796 | -1.518321 |
| H | 1.314908  | -2.460506 | -2.541171 |
| H | 0.149679  | -3.212361 | -1.439934 |
| C | 0.099192  | -2.775066 | 1.510254  |
| H | -0.508531 | -3.327406 | 0.790966  |
| H | 0.759291  | -3.500652 | 2.001732  |
| H | -0.563115 | -2.363732 | 2.275341  |
| C | 1.322543  | -0.222234 | 2.963273  |
| H | 0.329307  | -0.509254 | 3.314116  |
| H | 2.059869  | -0.746911 | 3.584036  |
| H | 1.446745  | 0.848869  | 3.130822  |
| C | 3.206947  | 1.313652  | 0.856757  |
| H | 2.858506  | 1.872533  | 1.727206  |
| H | 4.236327  | 0.993028  | 1.058652  |
| H | 3.231977  | 1.991978  | 0.001050  |
| C | 3.055246  | -0.229536 | -1.912188 |

|    |           |           |           |
|----|-----------|-----------|-----------|
| H  | 3.036170  | 0.850629  | -2.077423 |
| H  | 4.104196  | -0.531022 | -1.800111 |
| H  | 2.661129  | -0.718928 | -2.804071 |
| O  | -0.771702 | 1.748470  | 0.767365  |
| C  | -0.371892 | 2.586390  | -0.112435 |
| O  | 0.360224  | 2.122394  | -1.051911 |
| C  | -0.726858 | 4.038631  | -0.034345 |
| H  | -1.679353 | 4.170617  | 0.481641  |
| H  | 0.046501  | 4.563605  | 0.537416  |
| H  | -0.764379 | 4.474423  | -1.034250 |
| H  | 1.855359  | -3.642811 | -1.348365 |
| C  | -1.296803 | -0.177193 | -1.809333 |
| C  | -1.860046 | -0.804115 | -0.718631 |
| H  | -0.752948 | -0.737692 | -2.563280 |
| H  | -1.611230 | 0.821453  | -2.097010 |
| H  | -1.669603 | -1.868826 | -0.594152 |
| C  | -2.985013 | -0.259087 | 0.115350  |
| H  | -2.801746 | -0.459791 | 1.177926  |
| H  | -3.052613 | 0.826182  | 0.003725  |
| C  | -4.325296 | -0.918063 | -0.292636 |
| H  | -4.517804 | -0.711565 | -1.352399 |
| H  | -4.240906 | -2.008500 | -0.198893 |
| C  | -5.495124 | -0.415651 | 0.558859  |
| H  | -5.623169 | 0.667331  | 0.459448  |
| H  | -6.430299 | -0.891208 | 0.250177  |
| H  | -5.340584 | -0.639516 | 1.619788  |
| Rh | 0.288091  | 0.142333  | -0.190075 |

### TS1'

SCF energy in gas phase: -925.562576

Free energy in gas phase: -925.20749

Free energy in solution: -925.42279

|   |          |           |           |
|---|----------|-----------|-----------|
| C | 2.377555 | -0.181502 | -0.208090 |
| C | 1.730168 | -1.161001 | 0.639571  |
| C | 0.992608 | -0.451317 | 1.667189  |
| C | 1.107040 | 0.944012  | 1.404581  |
| C | 1.962793 | 1.120330  | 0.230698  |
| C | 3.355220 | -0.479707 | -1.302839 |
| H | 3.380418 | 0.313324  | -2.052214 |
| H | 3.132311 | -1.422841 | -1.806894 |
| C | 1.967130 | -2.641127 | 0.603448  |
| H | 2.219362 | -2.989696 | -0.400529 |
| H | 2.808238 | -2.898736 | 1.258869  |

|                                       |           |           |           |   |           |           |           |
|---------------------------------------|-----------|-----------|-----------|---|-----------|-----------|-----------|
| H                                     | 1.098318  | -3.203512 | 0.953108  | C | 1.171574  | -0.453769 | 1.594974  |
| C                                     | 0.261319  | -1.086235 | 2.808469  | C | 1.329860  | 0.914397  | 1.251941  |
| H                                     | -0.161119 | -2.054748 | 2.531578  | C | 2.057848  | 0.999157  | -0.024075 |
| H                                     | 0.954247  | -1.258089 | 3.641858  | C | 2.341898  | -0.321313 | -0.452943 |
| H                                     | -0.547921 | -0.452107 | 3.175002  | C | 1.880156  | -2.725773 | 0.498502  |
| C                                     | 0.545343  | 2.062678  | 2.225957  | H | 1.970952  | -3.129973 | -0.512209 |
| H                                     | -0.324892 | 1.746925  | 2.804481  | H | 1.047049  | -3.227352 | 0.996514  |
| H                                     | 1.304219  | 2.421044  | 2.932347  | C | 0.628274  | -1.011478 | 2.876443  |
| H                                     | 0.256358  | 2.909302  | 1.599400  | H | 0.043702  | -1.919189 | 2.710368  |
| C                                     | 2.410004  | 2.440862  | -0.315652 | H | 1.452353  | -1.273240 | 3.551591  |
| H                                     | 1.584123  | 3.154841  | -0.353254 | H | -0.005036 | -0.291680 | 3.400098  |
| H                                     | 3.192824  | 2.865362  | 0.325084  | C | 0.994000  | 2.101685  | 2.104864  |
| H                                     | 2.818980  | 2.344535  | -1.322867 | H | 0.207566  | 1.884958  | 2.830399  |
| O                                     | -2.580352 | 0.731764  | 0.378847  | H | 1.883604  | 2.412944  | 2.666487  |
| C                                     | -2.124430 | 1.765380  | -0.203020 | H | 0.682287  | 2.958721  | 1.502937  |
| O                                     | -0.996398 | 1.762837  | -0.808500 | C | 2.510626  | 2.277360  | -0.663887 |
| C                                     | -2.944218 | 3.028147  | -0.209979 | H | 1.723714  | 3.035909  | -0.651806 |
| H                                     | -3.860408 | 2.852144  | -0.782209 | H | 3.373082  | 2.688570  | -0.125040 |
| H                                     | -3.245580 | 3.272827  | 0.812018  | H | 2.809450  | 2.123909  | -1.702354 |
| H                                     | -2.388945 | 3.854724  | -0.651889 | C | 3.164204  | -0.730000 | -1.638201 |
| H                                     | 4.362955  | -0.566831 | -0.877903 | H | 3.178734  | 0.042580  | -2.409372 |
| C                                     | -0.081163 | -0.432813 | -2.588661 | H | 4.200748  | -0.909783 | -1.327605 |
| C                                     | -0.544971 | -1.468322 | -1.768561 | H | 2.797582  | -1.654366 | -2.091402 |
| H                                     | 0.819450  | -0.576399 | -3.176721 | O | -2.250974 | 1.685646  | 1.015707  |
| H                                     | -0.735224 | 0.374695  | -2.902115 | C | -1.935587 | 2.241540  | -0.145051 |
| H                                     | 0.014086  | -2.399830 | -1.703053 | O | -1.084164 | 1.749432  | -0.900487 |
| C                                     | -1.711877 | -1.283216 | -0.898889 | C | -2.695461 | 3.488628  | -0.468631 |
| H                                     | -1.902891 | -0.257770 | -0.123019 | H | -3.756626 | 3.243666  | -0.581707 |
| H                                     | -2.528201 | -0.836816 | -1.484169 | H | -2.615078 | 4.198717  | 0.359175  |
| C                                     | -2.164134 | -2.515865 | -0.103565 | H | -2.317384 | 3.929424  | -1.389522 |
| H                                     | -2.442692 | -3.292580 | -0.828373 | H | 2.795186  | -2.996832 | 1.040048  |
| H                                     | -1.307196 | -2.916373 | 0.452736  | C | -0.439027 | -0.721997 | -2.390526 |
| C                                     | -3.339667 | -2.281144 | 0.851136  | C | -0.934551 | -1.650543 | -1.443174 |
| H                                     | -4.210865 | -1.887087 | 0.318663  | H | 0.364320  | -1.024300 | -3.054971 |
| H                                     | -3.636292 | -3.223612 | 1.319380  | H | -1.068916 | 0.084254  | -2.755220 |
| H                                     | -3.090159 | -1.571758 | 1.644831  | H | -0.448757 | -2.618906 | -1.337076 |
| Rh                                    | 0.183515  | 0.032607  | -0.419060 | C | -1.847615 | -1.233628 | -0.444728 |
|                                       |           |           |           | H | -1.717376 | 0.862073  | 1.098453  |
| <b>IM2'</b>                           |           |           |           | H | -2.554377 | -0.455650 | -0.733915 |
| SCF energy in gas phase: -925.600181  |           |           |           | C | -2.335966 | -2.171403 | 0.635240  |
| Free energy in gas phase: -925.239741 |           |           |           | H | -1.548169 | -2.891674 | 0.887206  |
| Free energy in solution: -925.449302  |           |           |           | H | -2.552331 | -1.609838 | 1.552572  |
|                                       |           |           |           | C | -3.607282 | -2.929477 | 0.206718  |
| C                                     | 1.716305  | -1.234932 | 0.496049  | H | -3.421328 | -3.542700 | -0.680347 |

H -3.948597 -3.588567 1.010054  
H -4.421766 -2.236567 -0.027340  
Rh 0.100688 -0.057921 -0.380197

**IM3'**

SCF energy in gas phase: -1093.016688

Free energy in gas phase: -1092.653877

Free energy in solution: -1092.904691

C -2.503917 -0.415025 0.288813  
C -1.789383 -0.153396 1.529464  
C -0.768276 -1.127530 1.641395  
C -0.894518 -2.064463 0.512926  
C -1.996425 -1.651862 -0.281266  
C -3.749419 0.293441 -0.156528  
H -3.901812 0.214741 -1.235521  
H -3.735605 1.352333 0.111526  
C -2.129287 0.909022 2.530203  
H -2.548628 1.798963 2.056797  
H -2.879860 0.530364 3.235169  
H -1.256997 1.214930 3.111554  
C 0.185229 -1.295052 2.786774  
H 0.356674 -0.355972 3.316038  
H -0.222701 -2.013968 3.508235  
H 1.153786 -1.681638 2.460867  
C -0.108651 -3.334058 0.368132  
H 0.928446 -3.211218 0.690861  
H -0.545687 -4.120516 0.995878  
H -0.108711 -3.699981 -0.661016  
C -2.584940 -2.374958 -1.455686  
H -1.855241 -3.025831 -1.941825  
H -3.420874 -3.004397 -1.126303  
H -2.976649 -1.684507 -2.206494  
H -4.625174 -0.154153 0.329581  
C -0.295096 0.494889 -2.432428  
C -0.845853 1.589553 -1.710865  
H -0.930153 -0.048841 -3.125632  
H 0.758392 0.513767 -2.696270  
H -1.910150 1.802461 -1.788617  
C -0.101324 2.214692 -0.689350  
H 0.981892 2.224789 -0.790352  
C -0.663765 3.311683 0.177066  
H -1.751993 3.204980 0.257248  
H -0.256694 3.224444 1.191086

C -0.321916 4.708336 -0.378659  
H -0.744954 4.853280 -1.377497  
H -0.723051 5.486836 0.276478  
H 0.761011 4.853249 -0.445807  
N 1.726471 -0.163990 -0.250853  
C 2.669199 -0.835578 -0.832096  
C 3.722295 0.364383 0.692467  
O 2.377422 0.625298 0.742213  
O 4.571601 0.831044 1.370400  
O 3.889913 -0.574479 -0.325984  
C 2.545687 -1.809478 -1.940706  
H 1.499788 -1.930402 -2.219876  
H 3.122950 -1.459394 -2.802453  
H 2.963591 -2.772218 -1.631076  
Rh -0.425471 -0.021481 -0.309501

**TS2'**

SCF energy in gas phase: -1092.979146

Free energy in gas phase: -1092.62168

Free energy in solution: -1092.896462

C -2.598317 -0.289644 0.284604  
C -1.868377 -0.007716 1.512318  
C -0.902430 -1.034706 1.676034  
C -1.076928 -2.010408 0.592706  
C -2.150558 -1.574984 -0.231847  
C -3.803652 0.460994 -0.196360  
H -3.955523 0.348463 -1.272240  
H -3.741169 1.526619 0.034754  
C -2.143224 1.117716 2.462217  
H -2.549422 1.993673 1.953108  
H -2.882843 0.800836 3.207996  
H -1.243689 1.424713 2.999967  
C 0.059834 -1.178918 2.814518  
H 0.294581 -0.215962 3.271042  
H -0.376640 -1.821355 3.589818  
H 0.998586 -1.637390 2.498088  
C -0.344776 -3.314280 0.493597  
H 0.689747 -3.224711 0.832226  
H -0.830346 -4.061902 1.133215  
H -0.344036 -3.705253 -0.525996  
C -2.774383 -2.324180 -1.370224  
H -2.071183 -3.016888 -1.836767  
H -3.625472 -2.912562 -1.005204

|    |           |           |           |   |           |           |           |
|----|-----------|-----------|-----------|---|-----------|-----------|-----------|
| H  | -3.153258 | -1.651789 | -2.143248 | H | 0.393896  | -1.408572 | 3.105917  |
| H  | -4.700459 | 0.071703  | 0.301751  | C | 1.572682  | 1.229193  | 2.586249  |
| C  | -0.394869 | 0.479363  | -2.459109 | H | 1.068882  | 0.700389  | 3.396532  |
| C  | -0.831161 | 1.620146  | -1.733512 | H | 2.568930  | 1.519415  | 2.938612  |
| H  | -1.090466 | -0.016571 | -3.129199 | H | 1.006984  | 2.141810  | 2.376412  |
| H  | 0.652044  | 0.386884  | -2.727993 | C | 2.707859  | 2.220162  | -0.197730 |
| H  | -1.873590 | 1.926572  | -1.795856 | H | 2.213064  | 2.970966  | 0.420660  |
| C  | -0.017021 | 2.190586  | -0.737010 | H | 3.780843  | 2.253760  | 0.031583  |
| H  | 1.059360  | 2.056716  | -0.818516 | H | 2.587132  | 2.500405  | -1.246181 |
| C  | -0.454717 | 3.339242  | 0.129004  | C | 2.755994  | -0.263021 | -2.221276 |
| H  | -1.548407 | 3.365421  | 0.203016  | H | 2.633290  | 0.710769  | -2.700347 |
| H  | -0.061995 | 3.202979  | 1.142889  | H | 3.830850  | -0.480704 | -2.192341 |
| C  | 0.059935  | 4.684020  | -0.426114 | H | 2.289800  | -1.019165 | -2.857165 |
| H  | -0.336551 | 4.878651  | -1.427154 | H | 2.657971  | -3.314803 | -0.401046 |
| H  | -0.249223 | 5.503859  | 0.228075  | C | -0.968592 | 0.222141  | -2.151092 |
| H  | 1.152593  | 4.694955  | -0.484380 | C | -1.273432 | -1.008698 | -1.514949 |
| N  | 1.693291  | -0.393622 | -0.382423 | H | -0.320603 | 0.218431  | -3.021882 |
| C  | 2.745241  | -0.990323 | -0.820064 | H | -1.661512 | 1.054103  | -2.091954 |
| C  | 3.911177  | 0.274766  | 0.719961  | H | -0.795743 | -1.921727 | -1.864756 |
| O  | 2.689314  | 0.679586  | 0.915144  | C | -1.992665 | -1.042942 | -0.304469 |
| O  | 4.929049  | 0.597426  | 1.251339  | H | -2.639245 | -0.205271 | -0.048518 |
| O  | 3.944824  | -0.734633 | -0.332207 | C | -2.246279 | -2.303354 | 0.466562  |
| C  | 2.681130  | -2.014031 | -1.917976 | H | -1.512864 | -3.076537 | 0.211186  |
| H  | 1.659671  | -2.156511 | -2.267720 | H | -2.157337 | -2.096899 | 1.538911  |
| H  | 3.316620  | -1.677777 | -2.742578 | C | -3.675004 | -2.822949 | 0.183386  |
| H  | 3.084867  | -2.958009 | -1.540618 | H | -3.806742 | -3.070025 | -0.874061 |
| Rh | -0.515861 | -0.028331 | -0.320715 | H | -3.861438 | -3.726263 | 0.770334  |

#### IM4'

SCF energy in gas phase: -904.426116

Free energy in gas phase: -904.078146

Free energy in solution: -904.294728

|   |          |           |           |
|---|----------|-----------|-----------|
| C | 1.710347 | -1.422109 | -0.121080 |
| C | 1.393317 | -1.018838 | 1.234321  |
| C | 1.686242 | 0.382778  | 1.357657  |
| C | 2.181058 | 0.846830  | 0.079857  |
| C | 2.197999 | -0.275507 | -0.829834 |
| C | 1.700902 | -2.831827 | -0.633620 |
| H | 1.573851 | -2.875596 | -1.717827 |
| H | 0.916054 | -3.432519 | -0.169241 |
| C | 0.973069 | -1.933393 | 2.343746  |
| H | 0.376507 | -2.771404 | 1.978259  |
| H | 1.861336 | -2.352765 | 2.832946  |

|    |           |           |           |
|----|-----------|-----------|-----------|
| H  | 0.393896  | -1.408572 | 3.105917  |
| C  | 1.572682  | 1.229193  | 2.586249  |
| H  | 1.068882  | 0.700389  | 3.396532  |
| H  | 2.568930  | 1.519415  | 2.938612  |
| H  | 1.006984  | 2.141810  | 2.376412  |
| C  | 2.707859  | 2.220162  | -0.197730 |
| H  | 2.213064  | 2.970966  | 0.420660  |
| H  | 3.780843  | 2.253760  | 0.031583  |
| H  | 2.587132  | 2.500405  | -1.246181 |
| C  | 2.755994  | -0.263021 | -2.221276 |
| H  | 2.633290  | 0.710769  | -2.700347 |
| H  | 3.830850  | -0.480704 | -2.192341 |
| H  | 2.289800  | -1.019165 | -2.857165 |
| H  | 2.657971  | -3.314803 | -0.401046 |
| C  | -0.968592 | 0.222141  | -2.151092 |
| C  | -1.273432 | -1.008698 | -1.514949 |
| H  | -0.320603 | 0.218431  | -3.021882 |
| H  | -1.661512 | 1.054103  | -2.091954 |
| H  | -0.795743 | -1.921727 | -1.864756 |
| C  | -1.992665 | -1.042942 | -0.304469 |
| H  | -2.639245 | -0.205271 | -0.048518 |
| C  | -2.246279 | -2.303354 | 0.466562  |
| H  | -1.512864 | -3.076537 | 0.211186  |
| H  | -2.157337 | -2.096899 | 1.538911  |
| C  | -3.675004 | -2.822949 | 0.183386  |
| H  | -3.806742 | -3.070025 | -0.874061 |
| H  | -3.861438 | -3.726263 | 0.770334  |
| H  | -4.426962 | -2.078212 | 0.458824  |
| N  | -0.882759 | 1.672093  | 0.440396  |
| C  | -2.101911 | 2.248340  | 0.254634  |
| O  | -3.103137 | 1.723994  | 0.754472  |
| C  | -2.116353 | 3.587211  | -0.452207 |
| H  | -2.991252 | 3.627231  | -1.107028 |
| H  | -2.218772 | 4.378397  | 0.297407  |
| H  | -1.204377 | 3.768227  | -1.027525 |
| Rh | 0.040233  | 0.169019  | -0.191937 |

#### TS3A'

SCF energy in gas phase: -904.42113

Free energy in gas phase: -904.072005

Free energy in solution: -904.286251

|   |          |           |           |
|---|----------|-----------|-----------|
| C | 2.246056 | -0.954002 | -0.047159 |
| C | 1.418416 | -1.230604 | 1.085151  |

|   |           |           |           |                           |             |           |           |
|---|-----------|-----------|-----------|---------------------------|-------------|-----------|-----------|
| C | 0.983937  | 0.032306  | 1.663262  | Rh                        | 0.182353    | -0.090984 | -0.445020 |
| C | 1.521519  | 1.088422  | 0.863159  |                           |             |           |           |
| C | 2.290786  | 0.478428  | -0.217544 | <b>TS3B'</b>              |             |           |           |
| C | 2.988285  | -1.960892 | -0.874745 | SCF energy in gas phase:  | -904.41682  |           |           |
| H | 3.154602  | -1.604738 | -1.893645 | Free energy in gas phase: | -904.067595 |           |           |
| H | 2.459492  | -2.915495 | -0.929869 | Free energy in solution:  | -904.283857 |           |           |
| C | 1.142927  | -2.584136 | 1.666378  |                           |             |           |           |
| H | 1.229663  | -3.377071 | 0.920430  | C                         | -0.068042   | -1.983753 | -0.856004 |
| H | 1.872661  | -2.800172 | 2.456516  | C                         | -0.626732   | -2.018431 | 0.461598  |
| H | 0.150732  | -2.641745 | 2.120114  | C                         | 0.367865    | -1.516894 | 1.376803  |
| C | 0.168859  | 0.213330  | 2.905590  | C                         | 1.575607    | -1.222389 | 0.618550  |
| H | -0.307457 | -0.717320 | 3.218676  | C                         | 1.303469    | -1.508095 | -0.760709 |
| H | 0.814999  | 0.546222  | 3.727472  | C                         | -0.727492   | -2.474731 | -2.109503 |
| H | -0.609685 | 0.966369  | 2.757846  | H                         | -0.406308   | -1.911491 | -2.988848 |
| C | 1.429187  | 2.551127  | 1.173268  | H                         | -1.816633   | -2.423952 | -2.046772 |
| H | 0.478196  | 2.795880  | 1.651393  | C                         | -1.973779   | -2.551904 | 0.844370  |
| H | 2.233164  | 2.832910  | 1.864235  | H                         | -2.693433   | -2.475854 | 0.026728  |
| H | 1.536091  | 3.166372  | 0.277529  | H                         | -1.889521   | -3.613516 | 1.107615  |
| C | 3.108446  | 1.220014  | -1.228518 | H                         | -2.386187   | -2.032669 | 1.711993  |
| H | 2.668430  | 2.188577  | -1.474051 | C                         | 0.233925    | -1.445828 | 2.866306  |
| H | 4.112022  | 1.405448  | -0.824020 | H                         | -0.799870   | -1.274829 | 3.173530  |
| H | 3.225926  | 0.652547  | -2.153956 | H                         | 0.558061    | -2.395559 | 3.311175  |
| H | 3.971615  | -2.158303 | -0.431084 | H                         | 0.853731    | -0.654229 | 3.292070  |
| C | -0.390898 | -1.256772 | -2.322874 | C                         | 2.910063    | -0.842336 | 1.181972  |
| C | -1.140239 | -1.692180 | -1.222521 | H                         | 2.817273    | -0.336515 | 2.145248  |
| H | 0.415151  | -1.874970 | -2.703007 | H                         | 3.510388    | -1.746559 | 1.341549  |
| H | -0.775276 | -0.492380 | -2.987719 | H                         | 3.461103    | -0.193189 | 0.498092  |
| H | -0.861688 | -2.601144 | -0.692281 | C                         | 2.290564    | -1.393164 | -1.879995 |
| C | -2.240994 | -0.933290 | -0.695416 | H                         | 2.860525    | -0.463509 | -1.806329 |
| H | -2.820832 | -0.351541 | -1.400893 | H                         | 2.995041    | -2.233423 | -1.837029 |
| C | -2.919719 | -1.255955 | 0.595424  | H                         | 1.803876    | -1.423044 | -2.856733 |
| H | -2.275485 | -1.879360 | 1.225513  | H                         | -0.460008   | -3.524379 | -2.282369 |
| H | -3.099643 | -0.315390 | 1.127377  | C                         | -0.436772   | 1.642769  | -1.805843 |
| C | -4.268578 | -1.965550 | 0.333687  | C                         | -1.647295   | 1.054603  | -1.289914 |
| H | -4.132046 | -2.916190 | -0.190048 | H                         | -2.108914   | 0.250112  | -1.859837 |
| H | -4.761074 | -2.171014 | 1.287578  | C                         | -2.172575   | 1.394855  | -0.047264 |
| H | -4.937753 | -1.337392 | -0.261487 | H                         | -1.763528   | 2.266226  | 0.456448  |
| N | -1.238932 | 1.091991  | -0.944029 | C                         | -3.452394   | 0.835348  | 0.500058  |
| C | -1.657553 | 2.154857  | -0.183509 | H                         | -3.719392   | -0.090192 | -0.021749 |
| O | -2.143909 | 2.019812  | 0.942392  | H                         | -3.321075   | 0.587551  | 1.560210  |
| C | -1.577377 | 3.494825  | -0.895803 | C                         | -4.601384   | 1.859578  | 0.371288  |
| H | -2.580134 | 3.762770  | -1.244801 | H                         | -4.796173   | 2.106348  | -0.676355 |
| H | -1.254394 | 4.255669  | -0.180858 | H                         | -5.518242   | 1.447143  | 0.800940  |
| H | -0.907744 | 3.473771  | -1.758944 | H                         | -4.367754   | 2.787048  | 0.902532  |

|    |           |          |           |   |           |           |           |
|----|-----------|----------|-----------|---|-----------|-----------|-----------|
| N  | 0.663184  | 1.904221 | 0.100168  | H | -0.741780 | -1.544293 | -2.344230 |
| C  | 2.007618  | 2.182474 | 0.036151  | H | -1.466051 | -2.389528 | 0.548422  |
| O  | 2.712050  | 1.917171 | -0.937392 | C | -2.494112 | -0.614225 | -0.384403 |
| C  | 2.515787  | 2.948869 | 1.248699  | H | -2.975724 | -0.568254 | -1.373226 |
| H  | 3.504731  | 2.567136 | 1.513736  | C | -3.574357 | -0.785138 | 0.698940  |
| H  | 2.621586  | 4.002458 | 0.970182  | H | -3.077203 | -0.891602 | 1.671739  |
| H  | 1.840888  | 2.885187 | 2.105530  | H | -4.176198 | 0.125168  | 0.755956  |
| H  | 0.045996  | 1.190578 | -2.666617 | C | -4.493132 | -1.982637 | 0.427557  |
| H  | -0.254033 | 2.700488 | -1.685481 | H | -3.940390 | -2.927745 | 0.390379  |
| Rh | -0.042254 | 0.123775 | -0.042908 | H | -5.243905 | -2.074391 | 1.216639  |

**IM5A'**

SCF energy in gas phase: -904.489346

Free energy in gas phase: -904.136854

Free energy in solution: -904.34413

|   |           |           |           |
|---|-----------|-----------|-----------|
| C | 1.900695  | -0.449330 | 1.302622  |
| C | 1.660416  | 0.975710  | 1.069791  |
| C | 1.901915  | 1.237241  | -0.311018 |
| C | 2.280497  | -0.026302 | -0.942265 |
| C | 2.322730  | -1.044991 | 0.067580  |
| C | 1.829617  | -1.127863 | 2.633010  |
| H | 1.666416  | -2.202759 | 2.534018  |
| H | 1.035935  | -0.711908 | 3.257485  |
| C | 1.328307  | 1.990599  | 2.116706  |
| H | 0.858564  | 1.531552  | 2.988895  |
| H | 2.251381  | 2.478650  | 2.455511  |
| H | 0.653705  | 2.750024  | 1.720748  |
| C | 1.841206  | 2.573644  | -0.974921 |
| H | 0.947245  | 3.118288  | -0.660083 |
| H | 2.720469  | 3.165812  | -0.691061 |
| H | 1.836428  | 2.486552  | -2.062915 |
| C | 2.671994  | -0.185668 | -2.377069 |
| H | 2.087333  | 0.465662  | -3.030769 |
| H | 3.728012  | 0.085528  | -2.503384 |
| H | 2.554715  | -1.215582 | -2.719608 |
| C | 2.778425  | -2.462729 | -0.115471 |
| H | 2.636039  | -2.809584 | -1.141060 |
| H | 3.849048  | -2.539859 | 0.108734  |
| H | 2.256409  | -3.150363 | 0.554332  |
| H | 2.777212  | -0.985119 | 3.169005  |
| C | -0.619979 | -2.024688 | -1.375789 |
| C | -1.475388 | -1.760218 | -0.339190 |
| H | 0.058203  | -2.870761 | -1.336387 |

|    |           |           |           |
|----|-----------|-----------|-----------|
| H  | -5.023819 | -1.869203 | -0.523558 |
| N  | -1.578548 | 0.518785  | -0.182093 |
| C  | -1.946303 | 1.867531  | -0.169770 |
| O  | -1.131876 | 2.721661  | 0.159714  |
| C  | -3.345567 | 2.260880  | -0.607637 |
| H  | -3.984940 | 2.378344  | 0.273683  |
| H  | -3.280026 | 3.235025  | -1.094895 |
| H  | -3.817022 | 1.543700  | -1.282462 |
| Rh | 0.233622  | -0.237090 | -0.115489 |

**IM5B'**

SCF energy in gas phase: -904.4924

Free energy in gas phase: -904.139807

Free energy in solution: -904.346954

|   |           |           |           |
|---|-----------|-----------|-----------|
| C | -1.164762 | -1.892070 | -0.206076 |
| C | -0.576707 | -1.751743 | 1.092150  |
| C | 0.877282  | -1.719045 | 0.941097  |
| C | 1.170197  | -1.791057 | -0.456363 |
| C | -0.102443 | -1.864618 | -1.170913 |
| C | -2.612554 | -2.129638 | -0.513758 |
| H | -2.920986 | -1.648530 | -1.444647 |
| H | -3.267801 | -1.780600 | 0.285276  |
| C | -1.299371 | -1.756279 | 2.401942  |
| H | -2.336666 | -1.432322 | 2.297983  |
| H | -1.310676 | -2.773291 | 2.814465  |
| H | -0.807882 | -1.112801 | 3.135399  |
| C | 1.877509  | -1.706934 | 2.051095  |
| H | 1.436472  | -1.367515 | 2.990318  |
| H | 2.257880  | -2.724218 | 2.210610  |
| H | 2.718946  | -1.057257 | 1.803056  |
| C | 2.528587  | -1.892589 | -1.071974 |
| H | 3.237182  | -1.241526 | -0.558116 |
| H | 2.883901  | -2.928430 | -0.997136 |



|    |           |           |           |   |           |           |           |
|----|-----------|-----------|-----------|---|-----------|-----------|-----------|
| H  | 2.512803  | -1.624574 | -2.130285 | H | 1.963305  | -2.166675 | 3.094130  |
| C  | -0.254009 | -2.014523 | -2.650880 | H | 1.016196  | -0.697480 | 3.321912  |
| H  | 0.521370  | -1.470253 | -3.194524 | C | 2.700785  | 1.123183  | 1.804212  |
| H  | -0.164066 | -3.074046 | -2.924603 | H | 2.068379  | 1.218473  | 2.688902  |
| H  | -1.229386 | -1.667259 | -2.997385 | H | 3.724062  | 0.920515  | 2.144201  |
| H  | -2.786427 | -3.206331 | -0.630233 | H | 2.707375  | 2.083032  | 1.284124  |
| C  | 0.339135  | 2.743658  | -0.475527 | C | 3.357336  | 0.922446  | -1.284970 |
| C  | -0.995959 | 2.059619  | -0.750929 | H | 2.930307  | 1.922573  | -1.167532 |
| H  | -1.309380 | 1.938769  | -1.786782 | H | 4.387897  | 0.944128  | -0.911997 |
| C  | -1.843208 | 1.707252  | 0.263360  | H | 3.391199  | 0.689609  | -2.350385 |
| H  | -1.558518 | 1.980526  | 1.281872  | C | 2.231495  | -1.916443 | -2.352688 |
| C  | -3.267851 | 1.263843  | 0.080331  | H | 2.426354  | -1.154272 | -3.108983 |
| H  | -3.416179 | 0.874620  | -0.932549 | H | 3.105909  | -2.578598 | -2.319733 |
| H  | -3.502947 | 0.457314  | 0.782783  | H | 1.382624  | -2.523171 | -2.675462 |
| C  | -4.236950 | 2.437594  | 0.336073  | H | 1.403730  | -4.080111 | 0.512707  |
| H  | -4.067953 | 3.251002  | -0.375225 | C | -0.606123 | 0.040644  | -2.433892 |
| H  | -5.270750 | 2.098940  | 0.227374  | C | -1.447462 | -0.624106 | -1.578868 |
| H  | -4.120073 | 2.839378  | 1.347343  | H | 0.027651  | -0.504118 | -3.124867 |
| N  | 1.179932  | 1.618797  | -0.078990 | H | -0.684901 | 1.112215  | -2.585152 |
| C  | 2.548947  | 1.739498  | 0.160842  | H | -1.481883 | -1.711361 | -1.559907 |
| O  | 3.214596  | 0.761375  | 0.479939  | C | -2.413307 | 0.110293  | -0.666199 |
| C  | 3.165085  | 3.118162  | 0.021093  | H | -2.496619 | 1.144403  | -1.017407 |
| H  | 4.214155  | 3.058881  | 0.308481  | C | -3.817559 | -0.492631 | -0.578577 |
| H  | 3.097592  | 3.474686  | -1.012737 | H | -3.755271 | -1.537799 | -0.264528 |
| H  | 2.656241  | 3.851437  | 0.655558  | H | -4.372317 | 0.043864  | 0.201052  |
| H  | 0.704190  | 3.240729  | -1.382131 | C | -4.564162 | -0.377820 | -1.913831 |
| H  | 0.251840  | 3.505037  | 0.311909  | H | -4.049113 | -0.917367 | -2.716018 |
| Rh | 0.015183  | 0.040184  | -0.081823 | H | -5.566064 | -0.805055 | -1.824848 |

### IM6'

SCF energy in gas phase: -1133.599407

Free energy in gas phase: -1133.188754

Free energy in solution: -1133.435842

|   |           |           |           |   |           |          |           |
|---|-----------|-----------|-----------|---|-----------|----------|-----------|
| C | 1.335277  | -1.979136 | 0.104519  | H | -1.242765 | 0.730372 | 3.180950  |
| C | 1.535608  | -1.168281 | 1.280561  | H | -2.963500 | 0.371739 | 3.189325  |
| C | 2.236645  | 0.024374  | 0.899502  | C | -0.193168 | 2.995062 | 0.138055  |
| C | 2.555812  | -0.080911 | -0.517544 | O | 0.385631  | 2.096526 | -0.608802 |
| C | 2.023722  | -1.327747 | -0.992326 | O | -0.999161 | 2.756714 | 1.055306  |
| C | 0.711910  | -3.342934 | 0.087083  | C | 0.203818  | 4.422809 | -0.188728 |
| H | 0.477263  | -3.665531 | -0.929430 | H | -0.485657 | 5.119567 | 0.287865  |
| H | -0.210802 | -3.366019 | 0.672125  | H | 1.215310  | 4.611828 | 0.186572  |
| C | 1.151397  | -1.561691 | 2.669410  | H | 0.221030  | 4.580703 | -1.269514 |
| H | 0.247328  | -2.172683 | 2.686597  | H | -1.567386 | 1.228080 | 0.946926  |

|                           |              |           |           |                           |              |           |           |
|---------------------------|--------------|-----------|-----------|---------------------------|--------------|-----------|-----------|
| Rh                        | 0.377570     | 0.001631  | -0.294508 | H                         | -4.503793    | -2.991267 | -0.839886 |
|                           |              |           |           | H                         | -4.679851    | -1.523182 | -1.805059 |
| <b>TS4'</b>               |              |           |           | N                         | -1.588706    | 0.594807  | 0.134392  |
| SCF energy in gas phase:  | -1133.596142 |           |           | C                         | -2.079313    | 0.916468  | 1.432739  |
| Free energy in gas phase: | -1133.188739 |           |           | O                         | -1.302151    | 1.047793  | 2.359567  |
| Free energy in solution:  | -1133.434225 |           |           | C                         | -3.549991    | 1.264184  | 1.581439  |
|                           |              |           |           | H                         | -4.028741    | 0.557494  | 2.266098  |
| C                         | 1.049836     | -2.125029 | 0.269740  | H                         | -3.602798    | 2.250165  | 2.051027  |
| C                         | 0.921937     | -1.395148 | 1.500613  | H                         | -4.100100    | 1.286821  | 0.639887  |
| C                         | 1.814894     | -0.268990 | 1.442814  | C                         | 0.177521     | 2.978462  | -0.777118 |
| C                         | 2.589597     | -0.378341 | 0.208443  | O                         | 0.974509     | 2.000787  | -0.605475 |
| C                         | 2.106853     | -1.498866 | -0.521355 | O                         | -1.090548    | 2.857591  | -0.781569 |
| C                         | 0.415332     | -3.447219 | -0.039208 | C                         | 0.763106     | 4.352259  | -0.974680 |
| H                         | 0.306825     | -3.611766 | -1.113764 | H                         | 0.201211     | 4.884032  | -1.745524 |
| H                         | -0.566093    | -3.552284 | 0.427108  | H                         | 0.654292     | 4.915448  | -0.041568 |
| C                         | 0.073663     | -1.783389 | 2.668920  | H                         | 1.819270     | 4.297200  | -1.237486 |
| H                         | -0.779165    | -2.395905 | 2.368690  | H                         | -1.391229    | 1.728560  | -0.355265 |
| H                         | 0.679358     | -2.381322 | 3.362320  | Rh                        | 0.425527     | -0.049416 | -0.259866 |
| H                         | -0.296011    | -0.908242 | 3.202458  |                           |              |           |           |
| C                         | 2.054956     | 0.731364  | 2.529757  | <b>IM7'</b>               |              |           |           |
| H                         | 1.137998     | 0.936096  | 3.083385  | SCF energy in gas phase:  | -1133.609226 |           |           |
| H                         | 2.809701     | 0.350265  | 3.229491  | Free energy in gas phase: | -1133.196793 |           |           |
| H                         | 2.426008     | 1.673410  | 2.120699  | Free energy in solution:  | -1133.448597 |           |           |
| C                         | 3.691693     | 0.551447  | -0.182611 | C                         | 0.871526     | -2.175877 | 0.354778  |
| H                         | 3.348472     | 1.589144  | -0.156068 | C                         | 0.852435     | -1.370128 | 1.550149  |
| H                         | 4.524549     | 0.451437  | 0.523031  | C                         | 1.837440     | -0.341507 | 1.398186  |
| H                         | 4.068901     | 0.339518  | -1.184008 | C                         | 2.560181     | -0.589877 | 0.145827  |
| C                         | 2.651066     | -2.033655 | -1.811910 | C                         | 1.965237     | -1.704214 | -0.495505 |
| H                         | 3.135789     | -1.255232 | -2.403952 | C                         | 0.114154     | -3.452074 | 0.146768  |
| H                         | 3.398958     | -2.809020 | -1.605423 | H                         | -0.026376    | -3.680099 | -0.912204 |
| H                         | 1.871861     | -2.493345 | -2.424957 | H                         | -0.864078    | -3.433475 | 0.630530  |
| H                         | 1.049599     | -4.254981 | 0.347361  | C                         | 0.004176     | -1.599551 | 2.759277  |
| C                         | -0.367703    | 0.043488  | -2.450142 | H                         | -0.897685    | -2.167280 | 2.521558  |
| C                         | -1.211681    | -0.759833 | -1.720839 | H                         | 0.578263     | -2.181510 | 3.491841  |
| H                         | 0.375274     | -0.392976 | -3.109565 | H                         | -0.289644    | -0.655228 | 3.218076  |
| H                         | -0.570547    | 1.099872  | -2.586021 | C                         | 2.185903     | 0.700867  | 2.413465  |
| H                         | -1.126503    | -1.839017 | -1.808779 | H                         | 1.283668     | 1.091427  | 2.886830  |
| C                         | -2.356592    | -0.228474 | -0.851304 | H                         | 2.832202     | 0.267973  | 3.187541  |
| H                         | -3.032942    | 0.405950  | -1.442445 | H                         | 2.725892     | 1.532520  | 1.957015  |
| C                         | -3.157373    | -1.392600 | -0.248296 | C                         | 3.729266     | 0.212156  | -0.327496 |
| H                         | -2.462267    | -2.059163 | 0.278836  | H                         | 3.506195     | 1.281575  | -0.297525 |
| H                         | -3.855268    | -1.015414 | 0.501915  | H                         | 4.590124     | 0.029874  | 0.326600  |
| C                         | -3.951943    | -2.170501 | -1.305424 | H                         | 4.018332     | -0.050484 | -1.346280 |
| H                         | -3.310170    | -2.605371 | -2.078958 |                           |              |           |           |

|   |           |           |           |    |           |           |           |
|---|-----------|-----------|-----------|----|-----------|-----------|-----------|
| C | 2.414264  | -2.363088 | -1.765123 | H  | -4.824791 | -1.170882 | -1.788918 |
| H | 2.965221  | -1.675030 | -2.408824 | N  | -1.534765 | 0.609413  | 0.166798  |
| H | 3.078656  | -3.204288 | -1.532668 | C  | -1.921331 | 1.088002  | 1.410449  |
| H | 1.574218  | -2.765798 | -2.337089 | O  | -1.084828 | 1.327894  | 2.278172  |
| H | 0.680132  | -4.284820 | 0.583405  | C  | -3.381366 | 1.457841  | 1.637411  |
| C | -0.420152 | -0.029057 | -2.439592 | H  | -3.847347 | 0.725481  | 2.304325  |
| C | -1.308294 | -0.751596 | -1.677947 | H  | -3.397239 | 2.419896  | 2.154072  |
| H | 0.276232  | -0.531285 | -3.103330 | H  | -3.972324 | 1.528744  | 0.722159  |
| H | -0.555880 | 1.034163  | -2.607753 | C  | 0.435053  | 2.997934  | -0.816481 |
| H | -1.294981 | -1.836145 | -1.737057 | O  | 1.095297  | 1.947757  | -0.674395 |
| C | -2.394017 | -0.117005 | -0.798995 | O  | -0.869741 | 3.025809  | -0.767003 |
| H | -3.008049 | 0.579795  | -1.391479 | C  | 1.102175  | 4.318999  | -1.053988 |
| C | -3.313581 | -1.203613 | -0.215122 | H  | 0.586580  | 4.857614  | -1.852783 |
| H | -2.693900 | -1.940253 | 0.312396  | H  | 1.015852  | 4.923244  | -0.144483 |
| H | -3.974317 | -0.762647 | 0.533148  | H  | 2.153988  | 4.180311  | -1.299953 |
| C | -4.169345 | -1.890429 | -1.287269 | H  | -1.199594 | 2.107280  | -0.460264 |
| H | -3.563831 | -2.378686 | -2.058589 | Rh | 0.399643  | -0.110849 | -0.271283 |
| H | -4.804278 | -2.658057 | -0.837094 |    |           |           |           |
